# Supplementary figures and images for: Peanut-specific IgE antibodies in asymptomatic Ghanaian children possibly caused by carbohydrate determinant cross-reactivity
Source: PubMed Central journal article supplement — J Allergy Clin Immunol. 2013 Sep;132(3):639–47. doi: 10.1016/j.jaci.2013.04.023 (PMC3765958; doi:10.1016/j.jaci.2013.04.023), 2013-09

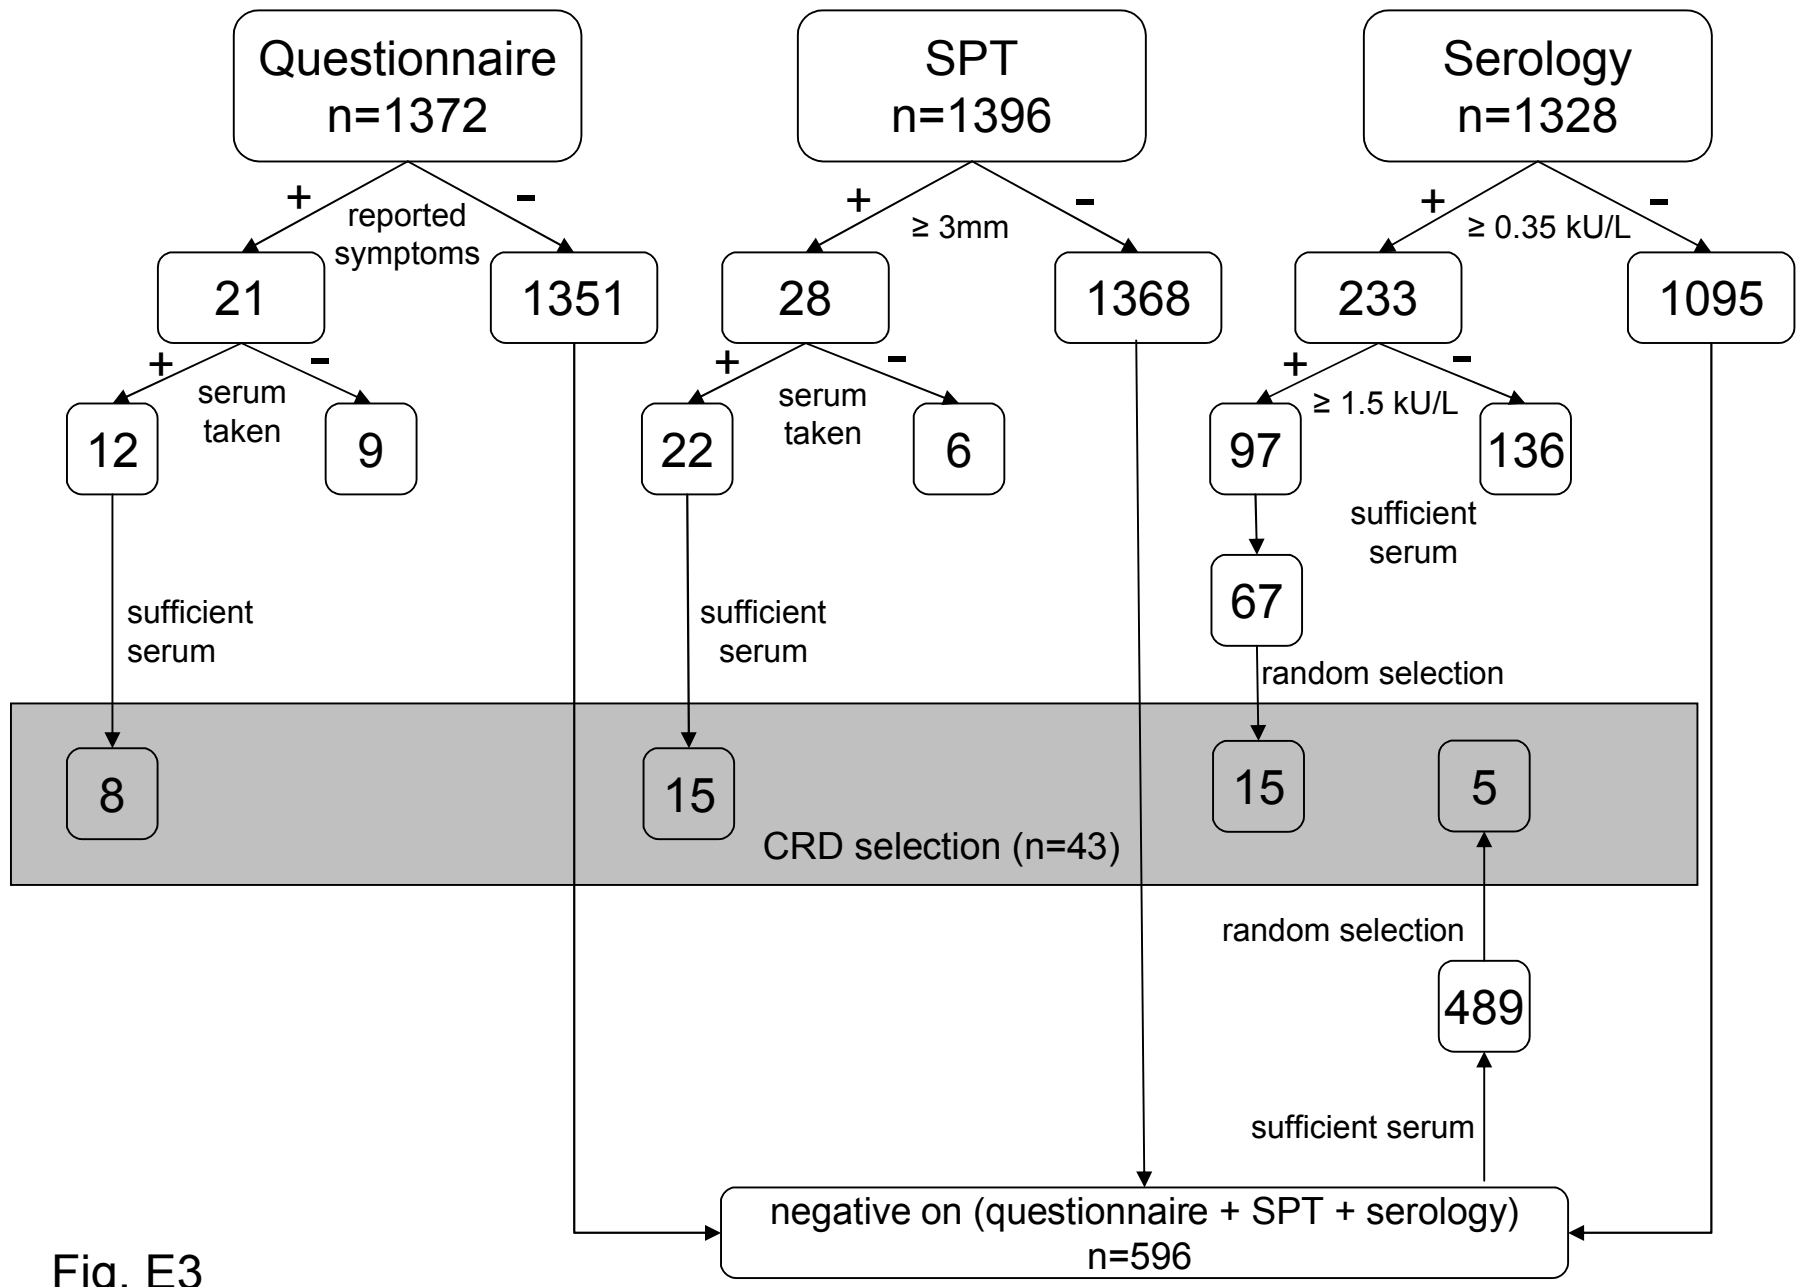

Fig. E3

Supplement: mmc3.pdf [file mmc3.pdf]
